# Supplementary material for: Enabling good outcomes in older adults on dialysis: a qualitative study
Source: PubMed Central journal article supplement (PMC6988330; doi:10.1186/s12882-020-1695-1), 2020-01-29
Supplement: 12882_2020_1695_MOESM1_ESM.pdf [file 12882_2020_1695_MOESM1_ESM.pdf]

## **Participant interview guide**

### **1. Introduction**

- a. Introduce yourself.
- b. Explain purpose of study; how interview is to be conducted and analysed.
- c. Offer option to review and edit interview after recording or transcription.

### **2. Participants' perception of outcome**

- a. How are you doing on dialysis? (Are you doing well or poorly?)
- b. Why do you think you are doing that way? (Explore what the participant's thoughts on what affecting the outcomes on dialysis).

### **3. The experience of being on dialysis**

- a. What are the best and worst things about life, in general, for you now?
- b. What are the best and worst things for you about life on dialysis?
- c. If you were not on dialysis, what would you be doing?

### **4. Relationships**

- a. How do the people around you influence how you cope with dialysis? (Role of family, friends, social networks)
- b. Tell me about your relationships with nurses / doctors. (How do you get along? Can you discuss all your concerns with them? What role do they play / how do they help?)

### **5. Managing life on dialysis**

- a. Regarding practical things (activities of daily living, money, transport, food) – how much do you still do?
- b. How much do others help? Who helps?

### **6. Thoughts of the future**

- a. How do you see the future playing out?
- b. Have you thought about treatment options if you were to be seriously unwell? (explore thoughts regarding advance care planning, healthcare proxies)
