# Supplementary material for: Enabling good outcomes in older adults on dialysis: a qualitative study
Source: PubMed Central journal article supplement (PMC6988330; doi:10.1186/s12882-020-1695-1), 2020-01-29
Supplement: 12882_2020_1695_MOESM2_ESM.pdf [file 12882_2020_1695_MOESM2_ESM.pdf]

Consolidated criteria for reporting qualitative studies (COREQ): 32-item checklist

| No.                                            | Item                                     | Comments                                                                                                                                                                                                                                   |
|------------------------------------------------|------------------------------------------|--------------------------------------------------------------------------------------------------------------------------------------------------------------------------------------------------------------------------------------------|
| <b>Domain 1: Research team and reflexivity</b> |                                          |                                                                                                                                                                                                                                            |
| 1                                              | Interviewer/facilitator                  | BB                                                                                                                                                                                                                                         |
| 2                                              | Credentials                              | <b>BB</b> -Masters in Public Health; <b>BN</b> ; <i>Cert. in Neph. Nursing</i> ; <b>RR</b> - <i>DM, MRCP(UK), FRACP, PhD candidate</i> ; <b>MF</b> – PhD (Psychology); <b>KA</b> – MSc Clinical Trials, PhD; <b>MJ</b> – FRACP, FASN, PhD  |
| 3                                              | Occupation                               | <b>BB</b> -Nurse; <b>RR,MJ</b> - Nephrologist; <b>MF</b> -Qualitative researcher; <b>KA</b> - Research Scientist & Educator,UTAS                                                                                                           |
| 4                                              | Gender                                   | BB- <i>Female</i>                                                                                                                                                                                                                          |
| 5                                              | Experience and training                  | <b>BB</b> (interviewer) – Formally trained in qualitative research, interviewing; <b>RR</b> (primary author and analysis) – Trained in qualitative research                                                                                |
| 6                                              | Relationship established                 | Some participants known to BB, RR                                                                                                                                                                                                          |
| 7                                              | Participant knowledge of the interviewer | <b>BB</b> is a nurse with experience in dialysis<br><b>RR</b> is a Nephrologist undertaking research towards his PhD                                                                                                                       |
| 8                                              | Interviewer characteristics              | <b>BB</b> is a nephrology nurse with interest in pre-dialysis education and supportive care; <b>RR</b> is a nephrologist with interest in outcomes in the elderly with renal failure; and is a PhD candidate at the University of Tasmania |
| <b>Domain 2: study design</b>                  |                                          |                                                                                                                                                                                                                                            |
| 9                                              | Methodological orientation and Theory    | Phenomenology; iterative thematic analysis                                                                                                                                                                                                 |
| 10                                             | Sampling                                 | Convenience sampling                                                                                                                                                                                                                       |
| 11                                             | Method of approach                       | Face-to-face                                                                                                                                                                                                                               |
| 12                                             | Sample size                              | n=17                                                                                                                                                                                                                                       |
| 13                                             | Non-participation(reason)                | n=1; “not interested”                                                                                                                                                                                                                      |
| 14                                             | Setting of data collection               | Participant’s homes (n=14) or dialysis unit (n=3)                                                                                                                                                                                          |
| 15                                             | Presence of non-participants             | No                                                                                                                                                                                                                                         |
| 16                                             | Description of sample                    | Participants aged ≥70 years (range 70–83); undergoing dialysis in the period 2014-2016; all Caucasian, English-speaking; 11 males, 6 females; none were employed                                                                           |
| 17                                             | Interview guide                          | Attached. Yes, pilot tested.                                                                                                                                                                                                               |
| 18                                             | Repeat interviews                        | No.                                                                                                                                                                                                                                        |
| 19                                             | Audio/visual recording                   | Yes. Audio recordings.                                                                                                                                                                                                                     |
| 20                                             | Field notes                              | Yes.                                                                                                                                                                                                                                       |
| 21                                             | Duration                                 | 45 minutes (range 30 to 75 minutes)                                                                                                                                                                                                        |
| 22                                             | Data saturation                          | Yes                                                                                                                                                                                                                                        |
| 23                                             | Transcripts returned                     | Participant offered chance to review; none requested this.                                                                                                                                                                                 |
| <b>Domain 3: analysis and findings</b>         |                                          |                                                                                                                                                                                                                                            |
| 24                                             | Number of data coders                    | RR/BB/MF                                                                                                                                                                                                                                   |
| 25                                             | Description of coding tree               | No                                                                                                                                                                                                                                         |
| 26                                             | Derivation of themes                     | Derived from data                                                                                                                                                                                                                          |
| 27                                             | Software                                 | NVivo qualitative data analysis Software; QSR International Pty Ltd., Australia. Version 10, 2014                                                                                                                                          |
| 28                                             | Participant checking                     | No. Participant offered chance to check; none requested this.                                                                                                                                                                              |
| 29                                             | Quotations presented                     | Yes; identified by anonymised participant numbers                                                                                                                                                                                          |

|           |                              |                                              |
|-----------|------------------------------|----------------------------------------------|
| <b>30</b> | Data and findings consistent | Quotations provided to illustrate each theme |
| <b>31</b> | Clarity of major themes      | Yes; identified as metathemes (Table 2)      |
| <b>32</b> | Clarity of minor themes      | Yes; see text under 'Results' and Table 2    |
